# Supplementary material for: Effect of media distraction (audio-visual and music) for pain and anxiety control in patients undergoing shock-wave lithotripsy: A systematic review and meta-analysis
Source: PubMed Central journal article supplement — Exp Ther Med. 2021 Apr 14;21(6):623. doi: 10.3892/etm.2021.10055 (PMC8082642; doi:10.3892/etm.2021.10055), 2021-04-14
Supplement: Supplementary_Data.pdf [file Supplementary_Data.pdf]

Table S1. Search strategy and PubMed search results.

| Search no. | Query                          | Search details                                                                                                                                                                                                                                                                                                                                                                                                            | No. of PubMed results |
|------------|--------------------------------|---------------------------------------------------------------------------------------------------------------------------------------------------------------------------------------------------------------------------------------------------------------------------------------------------------------------------------------------------------------------------------------------------------------------------|-----------------------|
| 1          | (lithotripsy) AND (music)      | ((('lithotripsy'[MeSH Terms] OR 'lithotripsy'[All Fields]) OR 'lithotripsies'[All Fields]) AND (((('music'[MeSH Terms] OR 'music'[All Fields]) OR 'music s'[All Fields]) OR 'musical'[All Fields]) OR 'musicality'[All Fields]) OR 'musically'[All Fields]) OR 'musicals'[All Fields]) OR 'musics'[All Fields])                                                                                                           | 13                    |
| 2          | (lithotripsy) AND (media)      | ((('lithotripsy'[MeSH Terms] OR 'lithotripsy'[All Fields]) OR 'lithotripsies'[All Fields]) AND (('media'[All Fields] OR 'media s'[All Fields]) OR 'medias'[All Fields])                                                                                                                                                                                                                                                   | 222                   |
| 3          | (lithotripsy) AND (television) | ((('lithotripsy'[MeSH Terms] OR 'lithotripsy'[All Fields]) OR 'lithotripsies'[All Fields]) AND (((('televised'[All Fields] OR 'televising'[All Fields]) OR 'television'[MeSH Terms]) OR 'television'[All Fields]) OR 'televisions'[All Fields]) OR 'television s'[All Fields])                                                                                                                                            | 10                    |
| 4          | (lithotripsy) AND (audio)      | ((('lithotripsy'[MeSH Terms] OR 'lithotripsy'[All Fields]) OR 'lithotripsies'[All Fields]) AND ('audio'[All Fields] OR 'audios'[All Fields])                                                                                                                                                                                                                                                                              | 1                     |
| 5          | (renal stone) AND (music)      | ((('kidney calculi'[MeSH Terms] OR ('kidney'[All Fields] AND 'calculi'[All Fields])) OR 'kidney calculi'[All Fields]) OR ('renal'[All Fields] AND 'stone'[All Fields]) OR 'renal stone'[All Fields]) AND (((('music'[MeSH Terms] OR 'music'[All Fields]) OR 'music s'[All Fields]) OR 'musical'[All Fields]) OR 'musicality'[All Fields]) OR 'musically'[All Fields]) OR 'musicals'[All Fields]) OR 'musics'[All Fields]) | 15                    |
| 6          | (renal stone) AND (media)      | ((('kidney calculi'[MeSH Terms] OR ('kidney'[All Fields] AND 'calculi'[All Fields])) OR 'kidney calculi'[All Fields]) OR ('renal'[All Fields] AND 'stone'[All Fields]) OR 'renal stone'[All Fields]) AND (((('media'[All Fields] OR 'media s'[All Fields]) OR 'medias'[All Fields])                                                                                                                                       | 337                   |
| 7          | (renal stone) AND (sound)      | ((('kidney calculi'[MeSH Terms] OR ('kidney'[All Fields] AND 'calculi'[All Fields])) OR 'kidney calculi'[All Fields]) OR ('renal'[All Fields] AND 'stone'[All Fields]) OR 'renal stone'[All Fields]) AND (((('sound'[MeSH Terms] OR 'sound s'[All Fields]) OR 'sounded'[All Fields]) OR 'soundings'[All Fields]) OR 'sounds'[All Fields]) OR 'sound s'[All Fields]) OR 'sounding'[All Fields])                            | 79                    |
| 8          | (renal calculi) AND (music)    | ((('kidney calculi'[MeSH Terms] OR ('kidney'[All Fields] AND 'calculi'[All Fields])) OR 'kidney calculi'[All Fields]) OR ('renal'[All Fields] AND 'calculi'[All Fields]) OR 'renal calculi'[All Fields]) AND (((('music'[MeSH Terms] OR 'music s'[All Fields]) OR 'musical'[All Fields]) OR 'musicality'[All Fields]) OR 'musically'[All Fields]) OR 'musicals'[All Fields])                                              | 13                    |
| 9          | (renal calculi) AND (sound)    | ((('kidney calculi'[MeSH Terms] OR ('kidney'[All Fields] AND 'calculi'[All Fields])) OR 'kidney calculi'[All Fields]) OR ('renal'[All Fields] AND 'calculi'[All Fields]) OR 'renal calculi'[All Fields]) AND (((('sound'[MeSH Terms] OR 'sound s'[All Fields]) OR 'sounded'[All Fields]) OR 'soundings'[All Fields]) OR 'sounds'[All Fields]) OR 'sound s'[All Fields]) OR 'sounding'[All Fields])                        | 73                    |
